# Supplementary material for: Guarani folk taxonomy sheds new light on stingless-bee conservation priorities in Neotropical agrofrontiers
Source: Research Square preprint supplement (doi:10.21203/rs.3.rs-7093749/v1), 2025-08-22
Supplement: Supplementary file 1 [file 397e2ac15067579af66a61ed.pdf]

## Electronic Supplementary Material 7 – Sensitivity analysis outputs

### A. Quantitative robustness check

The table below compares key descriptive statistics computed with all five included studies versus with only the two high-quality studies ( $JB\text{I} \geq 8$ ). Removing the three moderate-quality studies did not change the median ethnospecies richness or the relative ranking of management-practice and threat categories.

|                                      | All studies (n = 5) | High-quality only<br>(n = 2) | Change    |
|--------------------------------------|---------------------|------------------------------|-----------|
| Median<br>ethnospecies<br>richness   | 10                  | 10                           | —         |
| Top ranked<br>management<br>practice | Hive translocation  | Hive translocation           | No change |
| Top perceived<br>threat              | Deforestation       | Deforestation                | No change |

### B. Qualitative thematic robustness

Reflexive thematic analysis in NVivo 14 identified three major themes: “Taxonomic acuity and nomenclatural diversity”, “Customary management and reciprocity”, and “Land-use change as an existential threat”. Re-coding only the two high-quality studies confirmed the presence of all three themes, with no additional dominant categories emerging.

A full NVivo comparison report (coding stripes and node matrices) is available from the corresponding author upon reasonable request.
