# Supplementary material for: Guarani folk taxonomy sheds new light on stingless-bee conservation priorities in Neotropical agrofrontiers
Source: Research Square preprint supplement (doi:10.21203/rs.3.rs-7093749/v1), 2025-08-22
Supplement: Supplementary file 2 [file ccc03d628d5d76909681fb6d.pdf]

### Electronic Supplementary Material 3 – PRISMA-ScR Checklist

Guarani Mbya–Kaiowá folk taxonomy and stingless-bee (*Meliponini*) conservation: a scoping review (Benites et al., 2025)

The third column indicates where each PRISMA-ScR item is addressed in the manuscript.

| Item | Checklist item                                                                                                                        | Location in manuscript                                                      |
|------|---------------------------------------------------------------------------------------------------------------------------------------|-----------------------------------------------------------------------------|
| 1    | Identify the report as a scoping review.                                                                                              | Title page (labelled “scoping review”)                                      |
| 2    | Provide a structured summary of background, objectives, eligibility criteria, sources, charting methods, results and conclusions.     | Abstract                                                                    |
| 3    | Describe the rationale for the review in the context of what is already known.                                                        | Introduction – first two paragraphs                                         |
| 4    | Provide an explicit statement of the questions and objectives being addressed with key elements (e.g., population, concept, context). | Introduction – final paragraph                                              |
| 5    | Indicate whether a review protocol exists, where it can be accessed, and provide registration information.                            | Methods – Protocol and reporting standards (OSF DOI: 10.17605/OSF.IO/7AMGY) |
| 6    | Specify characteristics of the sources of evidence used as eligibility criteria.                                                      | Methods – Eligibility criteria                                              |
| 7    | Describe all information sources in the search and date last searched.                                                                | Methods – Search strategy (first paragraph)                                 |
| 8    | Present the full search strategy for at least one database, including any limits used, such that it could be repeated.                | Online Resource 1 + Methods – Search strategy (Table S1)                    |
| 9    | State the process for selecting sources of evidence (i.e., screening, eligibility) and whether it was done independently.             | Methods – Selection process; Fig. 1 (PRISMA-ScR flow diagram)               |
| 10   | Describe the methods of charting data from the included sources (e.g., piloted forms, independently in duplicate).                    | Methods – Data extraction and charting                                      |

|    |                                                                                                                                                    |                                                                                                         |
|----|----------------------------------------------------------------------------------------------------------------------------------------------------|---------------------------------------------------------------------------------------------------------|
| 11 | List and define all variables for which data were sought and any assumptions and simplifications made.                                             | Methods – Data extraction and charting (variable list)                                                  |
| 12 | If critical appraisal was done, provide rationale, describe methods, and how appraisal was used in any data synthesis.                             | Methods – Quality appraisal;<br>Results – Data synthesis;<br>Online Resource 7<br>(sensitivity outputs) |
| 13 | Describe the methods of handling and summarizing the data that were charted.                                                                       | Methods – Data synthesis;<br>Online Resource 5 (R scripts)                                              |
| 14 | Give numbers of sources screened, assessed for eligibility, and included, with reasons for exclusions at each stage, ideally using a flow diagram. | Results – Study selection;<br>Fig. 1 (PRISMA-ScR flow diagram)                                          |
| 15 | For each included source, present characteristics for which data were charted and provide the citations.                                           | Results – Study characteristics; Online Resource 2                                                      |
| 16 | If critical appraisal was conducted, present data on quality for each source.                                                                      | Results – Quality appraisal;<br>Online Resource 4 (JBI matrix)                                          |
| 17 | For each included source, present relevant data that were charted relating to the review questions and objectives.                                 | Results – Individual study summaries (Tables 1–3);<br>Online Resource 2                                 |
| 18 | Summarize and/or present the charting results as they relate to the review questions and objectives.                                               | Results – Synthesis subsections                                                                         |
| 19 | Summarize the main results, link to review questions and objectives, and consider relevance to key groups.                                         | Discussion – ‘Taxonomic insights from Guarani folk classification’                                      |
| 20 | Provide a brief summary of limitations of the scoping review process.                                                                              | Discussion – Limitations subsection                                                                     |
| 21 | Provide a general interpretation of the results with respect to the review questions and objectives, as well as implications and/or next steps.    | Discussion – Conclusions and implications for conservation                                              |
| 22 | Describe sources of funding for the included evidence and the scoping review, and the role of the funders.                                         | Funding Statement /<br>Acknowledgements                                                                 |

---

Checklist adapted from Tricco et al. (2018) PRISMA-ScR reporting guideline.
